# Supplementary material for: Development of surface plasmon resonance-based sensor for detection of silver nanoparticles in food and the environment
Source: PubMed Central journal article supplement (PMC3380250; doi:10.1007/s00216-012-5920-z), 2012-03-27

**Analytical and Bioanalytical Chemistry**

**Electronic Supplementary Material**

**Development of surface plasmon resonance-based  
sensor for detection of silver nanoparticles in food  
and the environment**

Sabina Rebe Raz, Maria Leontaridou, Maria G.E.G. Bremer, Ruud Peters, Stefan Weigel

**Figure 1:** Single particle ICPMS picture of ES AgNPs at a concentration of 14 ng/L.

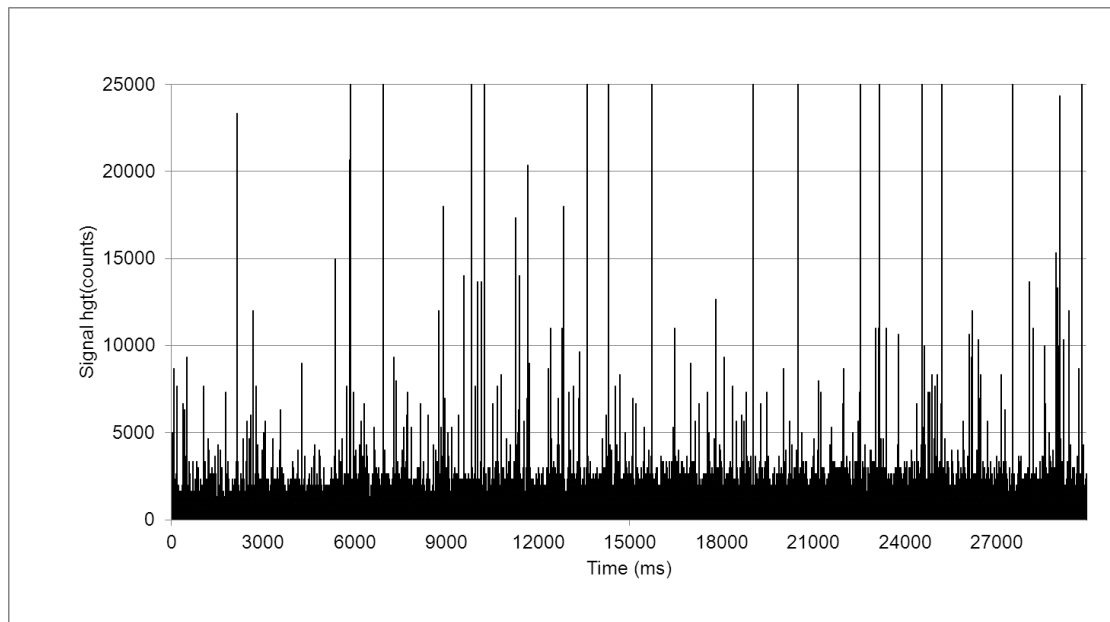

**Figure 2:** NaCl concentration effect on the responses produced by ES AgNPs.

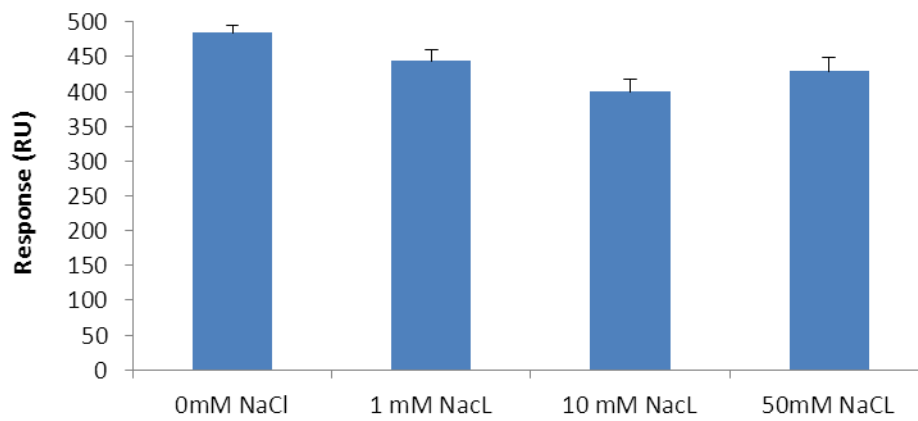

Supplement: 216_2012_5920_MOESM1_ESM.pdf [file 216_2012_5920_MOESM1_ESM.pdf]
